# Supplementary material for: An Intravascular Magnetic Catheter Enables the Retrieval of Nanoagents from the Bloodstream
Source: PubMed Central journal article supplement (PMC6145422; doi:10.1002/advs.201800807), 2018-08-01
Supplement: ADVS-5-1800807-s001.pdf [file ADVS-5-1800807-s001.pdf]

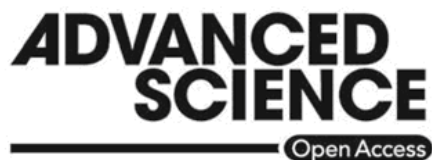

## Supporting Information

for *Adv. Sci.*, DOI: 10.1002/advs.201800807

**An Intravascular Magnetic Catheter Enables the Retrieval of Nanoagents from the Bloodstream**

*Veronica Iacovacci,\* Leonardo Ricotti, Edoardo Sinibaldi,\* Giovanni Signore, Fabio Vistoli, and Arianna Menciassi*

## Supporting Information

**An intravascular magnetic catheter enables the retrieval of nanoagents from the bloodstream**

Veronica Iacovacci\*, Leonardo Ricotti, Edoardo Sinibaldi\*, Giovanni Signore, Fabio Vistoli, and Arianna Mencias

## SUPPLEMENTARY FIGURES

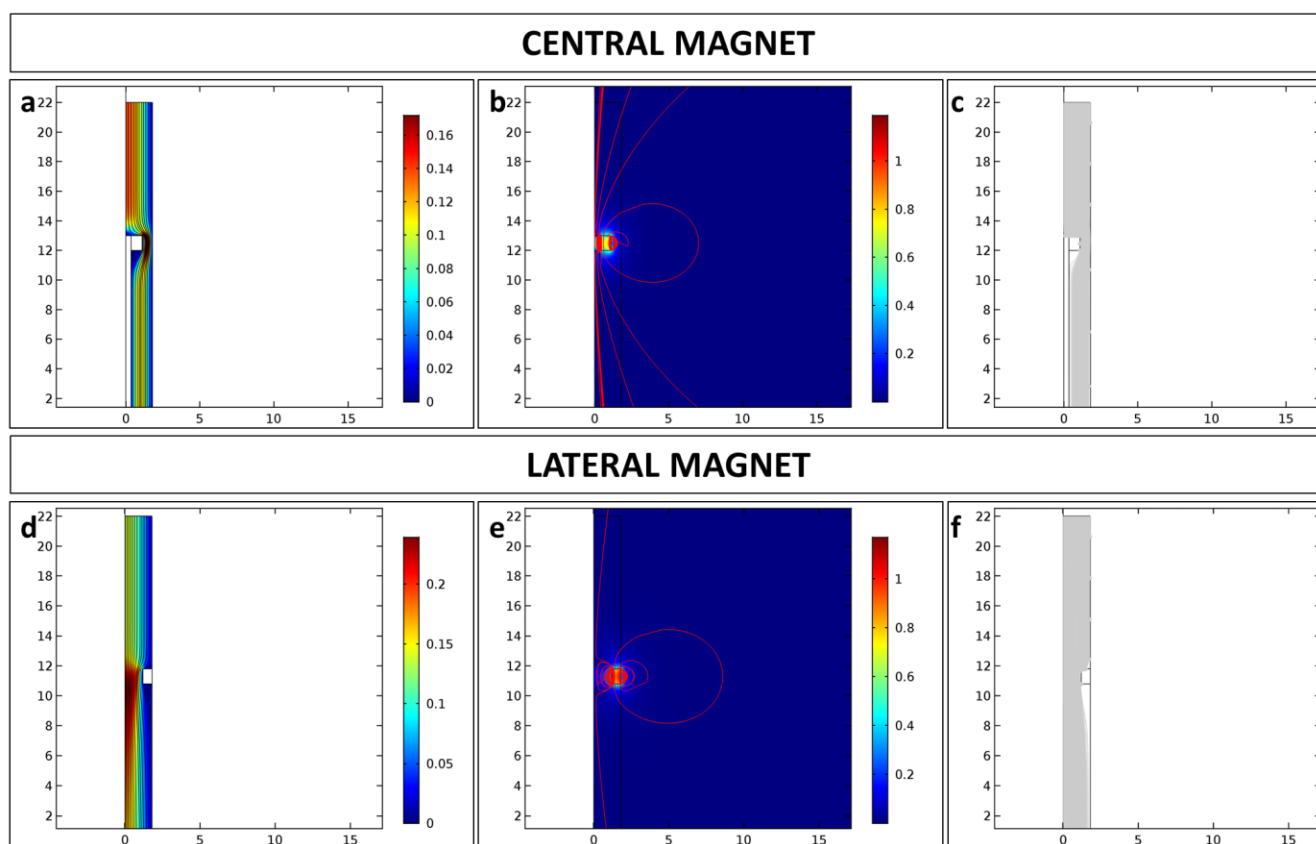

**Figure S1** Multiphysics simulation results when considering a single ring-shaped permanent magnet placed either at the center or along the side wall of the magnetic module. For each configuration fluidic field (a,d), magnetic field with streamlines (b,e) and particle trajectories (c,f) are reported. For tracing particle trajectories, 100 particles were considered.

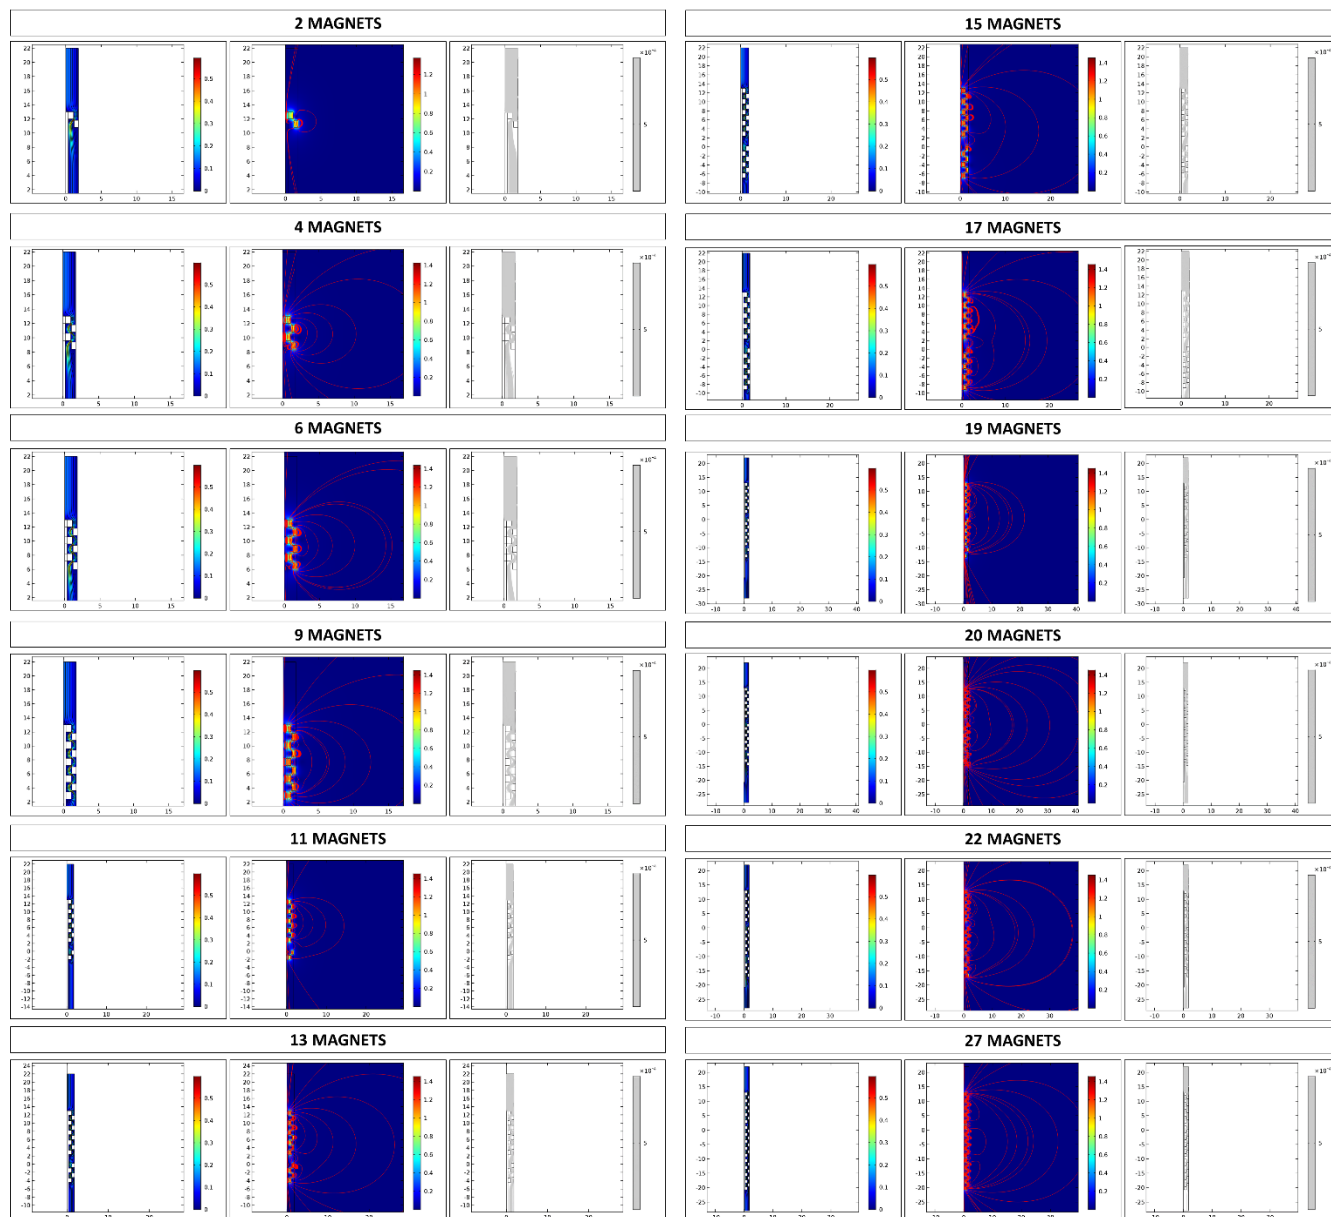

**Figure S2** Multiphysics simulation results when varying the number of the embedded permanent magnets from 2 to 27. For all configurations, fluidic field, magnetic field (with streamlines) and particles trajectories are reported. For tracing particle trajectories, 100 particles were considered.

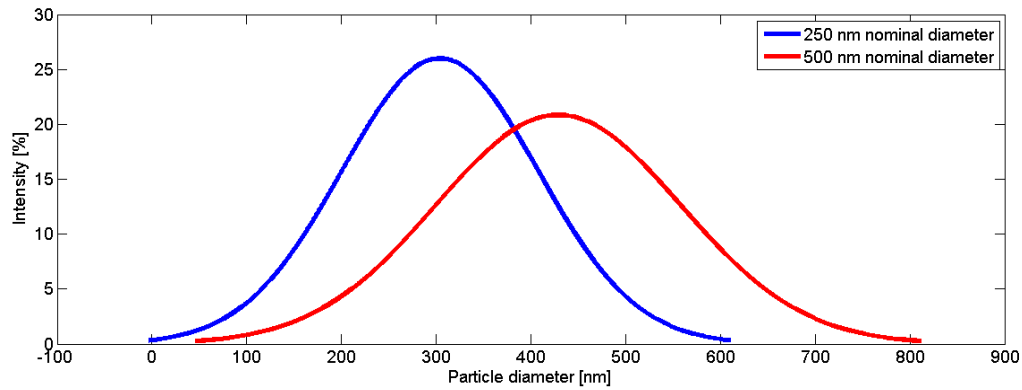

**Figure S3** Dynamic light scattering results for the two classes of magnetic nanoparticles. Recorded signal intensity features a distribution close to a Gauss plot with a certain deviation with respect to the peak value.

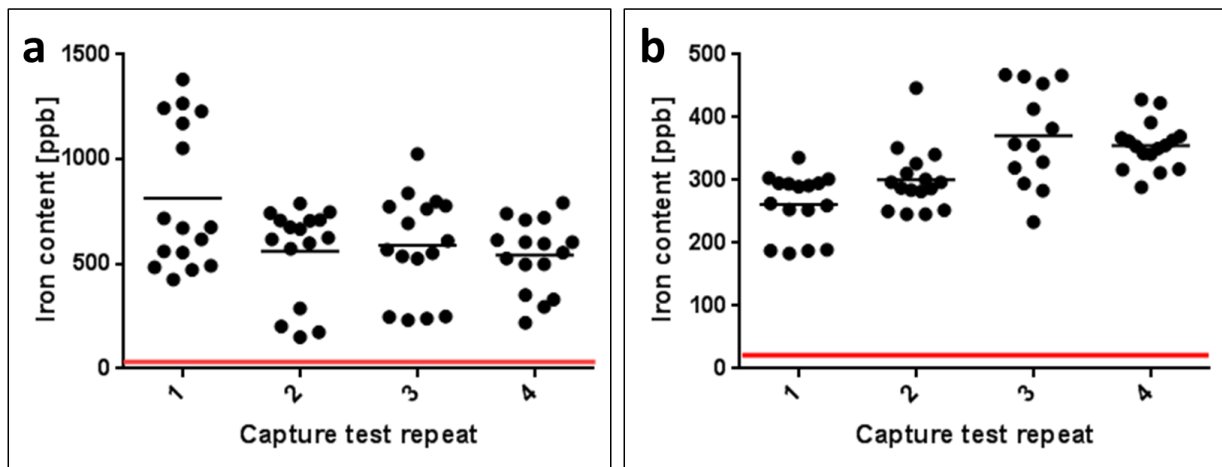

**Figure S4** ICP-MS analysis results for 250 (a) and 500 (b) nm nominal diameter nanoparticles. Iron content in 5  $\mu$ L samples from the collected solutions is plotted versus the capture test repetition. Results are expressed in terms of counts per billion and the red line represents the basal value corresponding to Iron content in the blood-mimicking solution.

|                        | CONTROL |        |        |                    | SINGLE PASSAGE |        |        |                 |
|------------------------|---------|--------|--------|--------------------|----------------|--------|--------|-----------------|
|                        | TEST 1  | TEST 2 | TEST 3 | MEAN               | TEST 1         | TEST 2 | TEST 3 | MEAN            |
| RBC<br>[ $10^6/\mu$ L] | 7.4     | 7.45   | 7.42   | 7.42 $\pm$ 0.02    | 6.99           | 7.35   | 7.35   | 7.23 $\pm$ 0.21 |
| Hct [%]                | 43.1    | 43.1   | 43     | 43.07 $\pm$ 0.06   | 41.9           | 43.1   | 42.8   | 42.6 $\pm$ 0.62 |
| Plt<br>[ $10^3/\mu$ L] | 380     | 355    | 385    | 373.33 $\pm$ 16.07 | 346            | 371    | 369    | 372 $\pm$ 13.89 |

**Table S 1** Ex vivo blood sample exams results: comparison among control (samples just passed across the commercial catheter, without any modification) and single passage samples (across the retrieval catheter, i.e. that one modified by adding the magnetic module).

|                              | CONTROL | 10 PASSAGES |        |        |             |
|------------------------------|---------|-------------|--------|--------|-------------|
|                              |         | TEST 1      | TEST 2 | TEST 3 | MEAN        |
| RBC<br>[10 <sup>6</sup> /μL] | 8.10    | 8.45        | 8.2    | 7.95   | 8.2±0.25    |
| Hct [%]                      | 47      | 49.4        | 48     | 47.1   | 48.17±1.16  |
| Plt<br>[10 <sup>3</sup> /μL] | 296     | 328         | 336    | 339    | 334.33±5.69 |

**Table S 2** Ex vivo blood sample exams results: comparison among control (samples just passed across the commercial catheter) and ten-passages samples (10 times across the retrieval catheter).
